# Supplementary material for: Dpy19l1, a multi-transmembrane protein, regulates the radial migration of glutamatergic neurons in the developing cerebral cortex
Source: PubMed Central journal article supplement — Development. 2011 Nov 15;138(22):4979–90. doi: 10.1242/dev.068155 (PMC3207862; doi:10.1242/dev.068155), 2011-11-15
Supplement: supp_138.22.4979_DEV068155TableS1.pdf [file supp_138.22.4979_DEV068155TableS1.pdf]

**Table S1. Primers**

| Gene                         | GenBank accession | Primers (5' to 3')                           | Expected size (bp) |
|------------------------------|-------------------|----------------------------------------------|--------------------|
| <b>RT-PCR</b>                |                   |                                              |                    |
| beta-actin                   | NM_007393         | GCCAACCGTGAAAAGATGAC<br>GCACTGTGTTGGCATAGAGG | 556                |
| <i>Dpy1911</i>               | NM_172920         | TGCATCATTATTGCCGTGT<br>CAGTCACTGTCTGAGAACTT  | 1234               |
| <i>Dpy1912</i>               | NM_001166207      | ACAAAACCTGGTTGCAGCAT<br>CCTCTTGCTCCACACAGAA  | 1012               |
| <i>Dpy1913</i>               | NM_178704         | ATGGCTTTCTCACCAGTGCT<br>GTGGCTCCGTGTATCAGGTT | 934                |
| <i>Dpy1914</i>               | NM_001081201      | CCCGAACTTTGGATGACACT<br>CGCTACAGGGAAGCTTTACG | 906                |
| <b>qPCR</b>                  |                   |                                              |                    |
| beta-actin                   | NM_007393         | GACAGGATGCAGAAGGA<br>TGATCCACATCTGCTGGAA     | 142                |
| <i>Neurod6 (Nex)</i>         | NM_009717         | GGGGAGGTTATCAGTGCAT<br>GCTTTAAACTGTAGGATGG   | 147                |
| <b>In situ hybridization</b> |                   |                                              |                    |
| <i>Dpy1911</i>               | NM_172920         | GCTGCTGCTAGCTTCCTTG<br>CAAGCAGGATCGCCCAAT    | 402                |
| <i>Dpy1911</i>               | NM_172920         | TGCATCATTATTGCCGTGT<br>CAGTCACTGTCTGAGAACTT  | 1234               |
| <i>Dpy1913</i>               | NM_178704         | ATGGCTTTCTCACCAGTGCT<br>GTGGCTCCGTGTATCAGGTT | 934                |
